1 **Large-scale genome-wide association study of food liking reveals**  
2 **genetic determinants and genetic correlations with distinct**  
3 **neurophysiological traits**

4  
5 Sebastian May-Wilson<sup>1</sup>, Nana Matoba<sup>2,3</sup>, Kaitlin Wade<sup>4,5</sup>, Jouke-Jan  
6 Hottenga<sup>6</sup>, Maria Pina Concas<sup>7</sup>, Massimo Mangino<sup>8,9</sup>, Eryk J.  
7 Grzeszkowiak<sup>1</sup>, Cristina Menni<sup>8</sup>, Paolo Gasparini<sup>7,10</sup>, Nicholas J.  
8 Timpson<sup>4,5</sup>, Maria G. Veldhuizen<sup>11</sup>, Eco de Geus<sup>6,12</sup>, James F. Wilson<sup>1,13</sup>,  
9 Nicola Pirastu<sup>1\*</sup>.

10

11

12 1 Centre for Global Health Research, Usher Institute, University of  
13 Edinburgh.

14 2. Department of Genetics, University of North Carolina at Chapel Hill;

15 3. UNC Neuroscience Center, University of North Carolina at Chapel Hill

16 4. Population Health Sciences, Bristol Medical School, University of Bristol;

17 5. Medical Research Council (MRC) Integrative Epidemiology Unit (IEU) at  
18 the University of Bristol.

19 6. Dept of Biological Psychology, FGB, Vrije Universiteit Amsterdam;  
20 Amsterdam Public Health research institute, Amsterdam UMC

21 7. Institute for Maternal and Child Health—IRCCS, Burlo Garofolo

22 8. Department of Twin Research and Genetic Epidemiology, King's College  
23 London

24 9. NIHR Biomedical Research Centre at Guy's and St Thomas' Foundation  
25 Trust

26 10. Department of Medicine, Surgery and Health Sciences, University of  
27 Trieste

28 11. Department of Anatomy, Faculty of Medicine, Mersin University

29 12. Amsterdam Public Health research institute, Amsterdam UMC

30 13. MRC Human Genetics Unit, Institute of Genetics and Molecular  
31 Medicine, University of Edinburgh.

32

33 \* Correspondence should be addressed at: [nicola.pirastu@ed.ac.uk](mailto:nicola.pirastu@ed.ac.uk)

34

35

## 36 **Abstract**

37  
38 Variable preferences for different foods are among the main determinants of  
39 their intake and are influenced by many factors, including genetics. Despite  
40 considerable twins' heritability, studies aimed at uncovering food-liking  
41 genetics have focused mostly on taste receptors. Here, we present the first  
42 results of a large-scale genome-wide association study of food liking  
43 conducted on 161,625 participants from UK Biobank. Liking was assessed  
44 over 139 specific foods using a 9-point hedonic scale. After performing  
45 GWAS, we used genetic correlations coupled with structural equation  
46 modelling to create a multi-level hierarchical map of food liking. We identified  
47 three main dimensions: high caloric foods defined as "Highly palatable",  
48 strong-tasting foods ranging from alcohol to pungent vegetables, defined as  
49 "Learned" and finally "Low caloric" foods such as fruit and vegetables. The  
50 "Highly palatable" dimension was genetically uncorrelated from the other  
51 two, suggesting that two independent processes underlie liking high reward  
52 foods and the Learned/Low caloric ones. Genetic correlation analysis with  
53 the corresponding food consumption traits revealed a high correlation, while  
54 liking showed twice the heritability compared to consumption. For example,  
55 fresh fruit liking and consumption showed a genetic correlation of 0.7 with  
56 heritabilities of 0.1 and 0.05, respectively. GWAS analysis identified 1401

57 significant food-liking associations located in 173 genomic loci, with only 11  
58 near taste or olfactory receptors. Genetic correlation with morphological and  
59 functional brain data (33,224 UKB participants) uncovers associations of the  
60 three food-liking dimensions with non-overlapping, distinct brain areas and  
61 networks, suggestive of separate neural mechanisms underlying the liking  
62 dimensions. In conclusion, we created a comprehensive and data-driven  
63 map of the genetic determinants and associated neurophysiological factors  
64 of food liking beyond taste receptor genes.

65

66

67

68

69

70

71

72

73

74

75

## 76 **Introduction**

77

78 Food consumption is one of the most important factors influencing our  
79 health and contributes to a large amount of excess mortality in the world <sup>1</sup>.  
80 With the near limitless availability of food in the Western world due to mass  
81 distribution, there has been a shift in factors driving dietary behaviour from  
82 merely consuming the food that is available to one of choice. For this  
83 reason, in parallel to understanding the effect of food consumption on  
84 health, there has been an increasing interest in understanding the drivers  
85 behind people's choices in order to direct them toward being more  
86 nutritious and thus reduce the burden of various diseases. Food choice is a  
87 complex process which involves many different factors such as personal  
88 preferences, health status, ethical beliefs and context. Rather than  
89 measures of preference (or choice), liking of foods reflects the individual  
90 hedonic response to foods<sup>2</sup> and is closely related to biology<sup>3-5</sup>. Thus,  
91 understanding food liking may be the first critical step in designing better,  
92 more targeted dietary interventions and more acceptable nutritious foods.  
93  
94 Food liking is a complex trait clearly influenced by biology, psychology<sup>6</sup>, the  
95 surrounding environment<sup>7</sup>, branding<sup>8</sup>, culture<sup>9</sup> and genetic inheritance<sup>10</sup>. In

96 particular, twin studies have shown that food preferences are moderately  
97 heritable traits, with around 50% of their variance in children being  
98 explained by genetic factors plus mostly shared environmental effects<sup>11,12</sup>.  
99 In adults, while heritability remains stable, the shared environmental  
100 component disappears in favour of the non-shared one (eg personal  
101 experiences)<sup>13–16</sup>

102 Although several recent GWAS have looked at the genetic variants  
103 associated with food consumption<sup>17–19</sup>, when it comes to liking attempts to  
104 identify the genetic factors underlying these food-liking traits have focused  
105 mostly on candidate gene studies<sup>20</sup> (PMID: 22888812  
106 ) (e.g., genes encoding taste receptors such as TAS2R43 and coffee  
107 liking<sup>21</sup>), with mixed results<sup>22</sup>. More recently, genome-wide approaches  
108 have been used to identify several genes related to the liking of different  
109 foods in an untargeted manner. For example, genetic variants have now  
110 been identified as being associated with the liking of sweet foods<sup>23</sup> or more  
111 common foods<sup>24</sup> such as cilantro/coriander<sup>25</sup>. However, these studies have  
112 focused either on specific sensations/tastes or tend to be small in sample  
113 size and are so underpowered to detect the likely modest effect sizes of  
114 common genetic variation on more specific food-liking traits.

115

116 Here, we present the results of a genome-wide association study (GWAS)  
117 for detailed food- and beverage-liking traits in more than 150,000  
118 participants from the UK Biobank study, with replication in up to 26,154  
119 individuals across 11 independent cohorts. Furthermore, we used genetic  
120 correlations combined with genomic structural equation modelling to create  
121 a multi-level map of the relationships between different food preferences,  
122 highlighting three main domains that we define as “Highly palatable”, “low  
123 caloric” and “learned” foods. We show that these dimensions are  
124 genetically correlated to distinct brain areas, behavioural, socio-economic,  
125 anthropometric, and biochemical traits which are expected to correlate with  
126 these food-liking factors, indirectly validating the model. Finally, we unravel  
127 the pleiotropic effects of many of the identified genetic variants, mapping  
128 them to the food-liking traits they influence directly.

129

## 130 **Methods**

131

### 132 **Study populations**

133 UK Biobank

134 Analyses were conducted on data collected in the UK Biobank study under  
135 project 19655. UK Biobank recruited more than 500,000 people aged 37 to

136 73 years from the United Kingdom between 2006 2010. The study,  
137 participants, and quality control have been described previously<sup>26</sup>. All  
138 subjects gave written informed consent. UK Biobank was approved by the  
139 North West Multi-Centre Research Ethics Committee (MREC) and in  
140 Scotland, UK Biobank was approved by the Community Health Index  
141 Advisory Group (CHIAG). We included only subjects who completed the  
142 food liking questionnaire and were of European descent. Full details of the  
143 genetic information, food-liking phenotypes are presented below.  
144 Genotyping was conducted using the UK Biobank or the UK BiLEVE Axiom  
145 Arrays. (Affymetrix, Santa Clara, CA, USA). Further details about  
146 imputation, principal components analysis, and QC procedures can be  
147 found elsewhere  
148 ([https://biobank.ctsu.ox.ac.uk/crystal/crystal/docs/genotyping\\_qc.pdf](https://biobank.ctsu.ox.ac.uk/crystal/crystal/docs/genotyping_qc.pdf)).

149

## 150 **Food-liking phenotypes**

151 Food-liking traits were collected through an online questionnaire comprising  
152 152 items, including both foods and non-food items, which was  
153 administered in 2019 to all UK Biobank participants who had agreed to be  
154 recontacted by the study. The questionnaire is an extension of the one  
155 previously used in Pallister et al. 2015<sup>13</sup> and Vink et al. 2020<sup>15</sup>. Given that

156 the questionnaire was administered online to participants pictures were  
157 removed, and we used a 9-point Hedonic scale<sup>27</sup>, where 1 corresponds to  
158 “Extremely dislike” and 9 to “Extremely like”. Other options also included  
159 “Have never tried it” and “Prefer not to answer”. Details of the questionnaire  
160 can be found at  
161 (<https://biobank.ndph.ox.ac.uk/showcase/showcase/docs/foodpref.pdf>). Of  
162 the 152 items, only the 139 pertaining to food and drink were retained for  
163 this specific study, while those which referred to habits such as physical  
164 activity were not included. Coffee- and tea-liking were measured asking  
165 both with and without sugar, we thus defined two additional measures for  
166 each: the first was the maximum score given to coffee and tea (coffee max  
167 and tea max) to reflect liking for the drink in the preferred way; the other  
168 was instead estimated as the difference between the sweetened vs the  
169 unsweetened drink to reflect polarization in liking, so higher values meant a  
170 higher liking for the sweetened drink while negative numbers reflected a  
171 stronger liking for the unsweetened drink.

172 A full list of the food-liking traits used in the study, mean number of  
173 participants and standard deviation of responses can be found in  
174 Supplementary Table 1.

175



## 176 **Statistical analyses**

177

### 178 **GWAS**

179 Genome-wide association analysis was performed for each of the 144  
180 food-liking traits using the raw reported score rescaled so that values would  
181 range between 0 and 1. After regressing each food liking trait with age, sex  
182 and the first 10 genetic principal components, array type and batch, we  
183 accounted for genetic relatedness between the participants using  
184 GRAMMAR+ residuals<sup>28</sup> as estimated in fastGWA<sup>29</sup>. Finally, GWAS was  
185 performed using regscan<sup>30</sup> assuming an additive model on all SNPs with  
186 MAF > 0.001. Given the high number of food-liking traits analysed and the  
187 high correlation between them, to estimate study-wide significance, we first  
188 estimated the minimum number of independent components which  
189 accounted for at least 95% of the variance over all the traits. This was  
190 achieved by estimating the eigen decomposition of the genetic correlation  
191 matrix between all the studied food liking questionnaire items. We  
192 estimated that 34 components are sufficient to explain >95% of genetic  
193 variance and we thus considered a p-value of  $p < 1.47 \times 10^{-9}$  ( $5 \times 10^{-8} / 34$ )  
194 as the study-wide significant threshold. Given that many loci showed  
195 association with multiple traits, we also considered all associations that

196 reached a conventional genome-wide significance threshold ( $p < 5 \times 10^{-8}$ ) if  
197 the SNPs were in the same genomic locus as a study-wide significant one.

198

### 199 **Clustering of food-liking items, hierarchical model construction.**

200 To describe the interrelationships between the food-liking questionnaire  
201 items we used hierarchical factor analysis where multiple steps of factor  
202 analysis are performed. In our case we first estimated the pairwise genetic  
203 correlations between all pairs of the original food-liking items from the  
204 questionnaire using the LD-score regression (ldsc) software<sup>31</sup>. We then  
205 performed hierarchical clustering using Ward's D2 method, as implemented  
206 in the hclust function of R. We then visually defined a first set of groups that  
207 showed a high level of within-group correlation across the individual food-  
208 liking items. We then estimated a first set of factors, one for each defined  
209 group of items. Validity of each of these models were estimated using  
210 GenomicSEM R package<sup>32</sup> and looking at goodness of fit metrics,  
211 specifically comparative fit index (CFI)  $> 0.9$  and a Standardized Root Mean  
212 Square Residual (SRMR)  $< 0.1$ . If the model did not have a good fit, we  
213 checked whether this could be due to single items and they were removed  
214 accordingly. Once the first level of factors was defined, we estimated the  
215 effect of each SNP on the factor variable, obtaining for each factor

216 complete GWAS summary statistics. We then estimated genetic  
217 correlations between the resulting factors, if any two factors exhibited a  
218 genetic correlation larger than 0.9, the items of the two groups were  
219 merged together and a new overall factor was estimated. The factors  
220 GWAS then become the starting point for building a higher order of factors.  
221 This procedure was repeated until we ended up with a hierarchical  
222 structure composed of only 4 high order factors and up to 4 levels. To  
223 make the results more readable we assigned to each of the factors a label  
224 to better interpret what it is capturing (e.g. Meat for the factor derived from  
225 all the meat items), however to keep the difference between observed and  
226 derived factor traits, we have added an “F” before the label (e.g. F-Meat)

227

### 228 **Estimation of the effect of each SNP with each factor.**

229 To estimate the effect of each SNP on each of the latent variables or  
230 factors, we first used GemoniSEM to estimate the loadings of each  
231 observed variable onto the latent one. We then applied the method  
232 described in Tsepilov et al 2020<sup>33</sup>. Briefly the effect of each SNP on each  
233 factor is estimated as the weighted linear combination of the effect of the  
234 SNP on each index variable, where the weights are represented by the  
235 loadings of each item on the latent variable. This is analogous to using the

236 usergwas function in GenomicSEM, but leads to a large reduction in  
237 computing time.

238

### 239 **Comparisons between food liking and food consumption traits.**

240 In order to understand how our food-liking measures were related to diet,  
241 we performed genetic correlation analysis between the GWAS of the food  
242 frequency questionnaire and the alcohol consumption data, available  
243 through the Pan UKBB project website  
244 (<https://pan.ukbb.broadinstitute.org/>). We also compared heritability ( $h^2$ )  
245 estimated using LD-score regression. Heritability comparison and genetic  
246 correlations analysis was limited to those traits for which either the exact  
247 same item was present in both the food frequency questionnaire and the  
248 food liking questionnaire (e.g. white wine) or items with a corresponding  
249 and similar item between both questionnaires (e.g. Cheese).

250

### 251 **Genetic correlations with other complex traits.**

252 Genetic correlations with other complex traits for the three top order traits  
253 was performed using the ldhub web portal  
254 (<http://ldsc.broadinstitute.org/ldhub/>). Given the high number of correlations  
255 estimated, we selected a set of 31 traits representative of the socio-

256 economic, anthropometric, blood biochemistry and health-related behaviour  
257 traits, to summarise the results.

258

### 259 **Locus definition and colocalisation analysis**

260 To define the boundaries of each locus, we first selected all SNPs with p-  
261 value  $<1 \times 10^{-5}$  and then estimated the distance between each consecutive  
262 SNP located on the same chromosome. Two consecutive SNPs were  
263 identified as belonging to different loci if they were more than 250 kb apart.  
264 This approach allows locus identification based on peak shape rather than  
265 a fixed distance from a sentinel SNP. A locus was then considered  
266 “significant” if it contained at least one SNP with p-value below  $1.47 \times 10^{-9}$ .  
267 Loci which showed overlapping boundaries were merged. To finally test if  
268 the underlying causal SNPs between the merged loci were the same or  
269 were just close to each other in the genome, we utilised the HyPrColoc  
270 method<sup>34</sup>. Briefly, HyPrColoc tests if a group of traits (e.g., food liking  
271 traits) colocalise and returns the probability of each SNP in the locus being  
272 causal. Moreover, it returns a separate overall regional colocalisation  
273 probability. We thus divided the positional loci into sub-loci based on the  
274 results of this analysis and then used the SNP with the highest probability  
275 of being causal for each cluster as sentinel SNP.

## 276 **Meta-analysis and replication**

277 Replication of the GWAS for the questionnaire items was conducted using  
278 up to 26,154 samples coming from 11 different cohorts mostly of European  
279 ancestries: ALSPAC, INGI-CARL, INGI-VB , INGI-FVG, CROATIA-Korcula,  
280 NTR , Silk Road, the TWINS UK cohort, CROATIA-Vis and VIKING. Details  
281 of each cohort can be found in Supplementary Table 2

282 Given that each cohort used a related but different questionnaire meta-  
283 analysis was performed only on the overlapping food liking traits for which  
284 at least 10,000 samples were available.

285 Given that different cohorts have used different scales we have rescaled  
286 the results so that they would reflect a scale going from 0 to 1. Prior meta-  
287 analysis QC on the summary stats was performed using EasyQC v 28.3<sup>35</sup>.

288 All traits were meta-analysed using inverse variance weighting conducted  
289 using METAL v 2018-08-28<sup>36</sup>.

290 Given that only a limited number of traits was available for at least ten  
291 thousand samples it was possible to attempt replication of only 235 SNP-  
292 trait associations.

293

294

## 295 **Gene prioritisation**

296 To define the gene that was most likely to be responsible for the observed  
297 association at each locus, we proceeded with custom prioritisation  
298 according to the following criteria. We first ran haploR v.4.0.2<sup>37</sup> using  $r^2=0.8$   
299 as the threshold using the sentinel SNP in each sub-locus. If a SNP was  
300 not available within the HaploReg resource, we used the most likely  
301 available one. Then, genes were prioritised if the locus met one of the  
302 following conditions (in order of importance):

- 303 1) The sentinel SNP is itself or is in strong LD ( $r^2>0.8$ ) with a non-  
304 synonymous SNP in the gene;
- 305 2) The sentinel SNP is itself or is in strong LD ( $r^2>0.8$ ) with a  
306 coding SNP in the gene (synonymous or in the untranslated  
307 region of the gene);
- 308 3) The top SNP is intronic or is in complete LD with an intronic  
309 SNP in the gene;
- 310 4) The top SNP is in strong LD ( $r^2>0.8$ ) with an intronic SNP in  
311 the gene;
- 312 5) The closest gene.

313

314 **Estimating the direct effect of each SNP on specific food-liking and**  
315 **latent factor traits.**

316 One of the aims of this study was to understand which SNPs influence  
317 different food-liking traits and if these associations were mediated through  
318 some higher order latent factor or if it was directly influencing the food trait  
319 of interest. For example, if we consider alcoholic beverages, we can  
320 imagine that some SNPs may influence liking of lower order food traits  
321 such as beer or wine through overall liking of alcohol, or directly on beer-  
322 liking or both. We thus aimed at untangling the direct effect of the SNPs on  
323 each food-liking and latent factor trait, from those mediated through other  
324 connected traits.

325

326 To do this, we used GenomicSEM, which allows fitting the effect of each  
327 SNP onto multiple traits at the same time, while considering their  
328 relationships. The limitation, however, is that it is not possible to fit the  
329 effect of the SNP on all observed variables and the latent variable at the  
330 same time, given that the number of observed SNP estimates is less than  
331 the parameters we need to estimate.

332 Therefore, we developed a strategy that enabled us to get all the required  
333 estimates. To illustrate this strategy, let's imagine we have 3 correlated



334 food-liking traits (T1-T3), for which a SNP effect is available and where the  
335 common variance can be explained by a latent variable L1 (Fig 1 Panel (A-  
336 1)). The first step of our analysis was to estimate the effect of the SNP on  
337 the latent variable L1 (Fig 1 Panel (A-2)); to fit the effect of the SNP on all 4  
338 traits at once to estimate all 4 parameters, we need to provide at least the  
339 same number of observed estimates. However, only 3 are available. To  
340 solve this, we created a new model, where we considered L1 as an  
341 observed variable and created a new dummy latent variable (DV) that  
342 explained all 4 traits and that was highly correlated (0.99) with L1. The SNP  
343 effect is then fit onto the original 3 food-liking traits (T1-T3) and the dummy  
344 variable such that we could obtain the estimate of the SNP effect on the  
345 latent variable and the residuals of the 3 food-liking traits at the same time.

346  
347 The described approach is useful to solve simple one factor models, but it  
348 cannot be directly applied to the complex hierarchical model we created, as  
349 it would be computationally infeasible. We thus split the hierarchical model  
350 of food items into smaller trees, where only one latent variable and its  
351 observable food traits were used. In efforts to retain the overall structure,  
352 we fixed the loadings of the food-liking traits onto the factor to be the same

353 as those estimated during the construction of the model. Fig. 1 panel B  
354 summarises this strategy.  
355 For all intermediate order traits, this approach led us to have for several  
356 factors 2 different conditional estimates: one where the latent factor trait  
357 was conditioned on the index food traits and another in which it  
358 represented the index trait. To select which estimate captured best the  
359 direct effect, we select the one with the smallest absolute value of Z-score.  
360 We can imagine that if the effect of the SNP is mediated through another  
361 trait, conditioning on this trait will lead to a decrease in the effect, and thus  
362 the estimate with the smallest effect would correspond to the correct one.  
363 Fig. 1 panel B1-3 reports a scheme of this strategy. To test if the  
364 conditional SNP estimate was different from the original estimate we used  
365 the method from Clogg et al 1995<sup>38</sup>:

366

367

$$Z = \frac{\beta_1 - \beta_2}{\sqrt{SE_{\beta_1}^2 + SE_{\beta_2}^2}}$$

368

369 We considered “direct effect only” SNP/trait effects which showed  $p > 0.05$   
370 at this test.

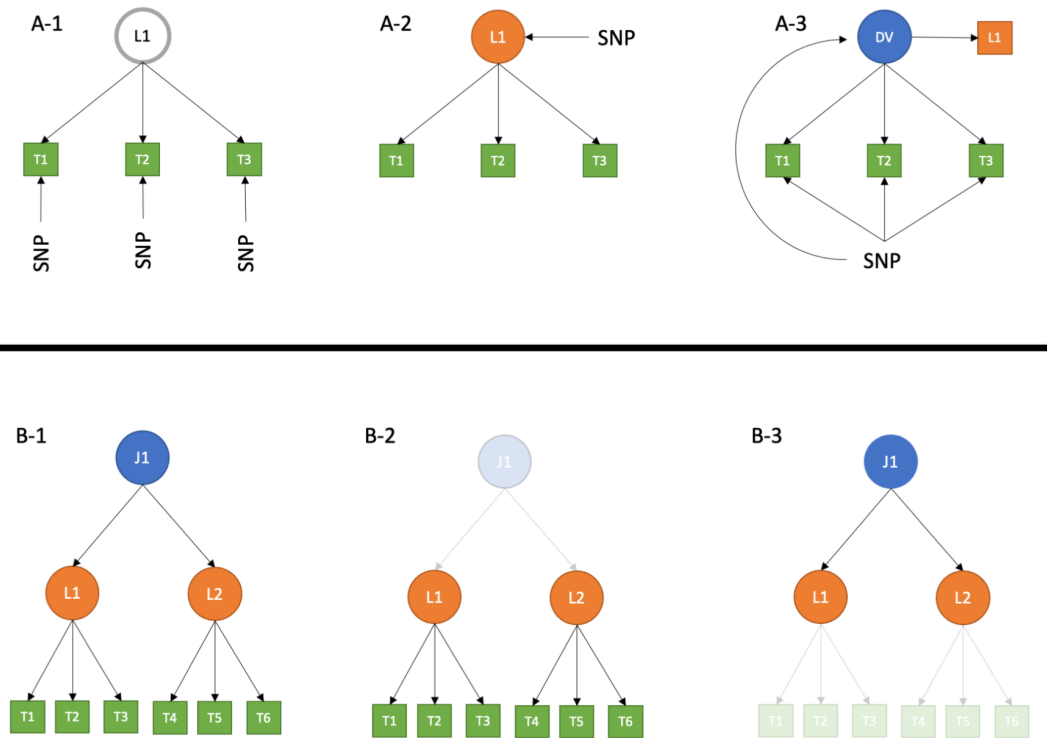

371

372 **Fig. 1.** Strategy to map loci to specific traits. Panel A shows the strategy to  
373 fit the SNP effect contemporarily on all food liking traits in the model. We  
374 started with the SNP effect on each observed trait participating in the model  
375 (A-1). We then used GenomicSEM to estimate the effect of the SNP on the  
376 latent variable, L1, based on the observed ones (A-2). We finally used the  
377 SNP estimate on L1 as though it were directly observed and created a new  
378 dummy latent variable (DV) strongly correlated to L1 (0.99) and fit the SNP  
379 effect on LD and all participating food liking traits at the same time (A3).  
380 Panel B shows the strategy used to fit the multiorder model. The full model  
381 (B-1) is split into levels composed of 1 latent variable and its observable

382 variables and the strategy described in panel A is applied. This is repeated  
383 level-by-level (B-3) and then results of all conditioning models for each trait  
384 are compared.

385

### 386 **Functional and Tissue enrichment analysis**

387 For enrichment analysis we expanded the gene selection to all those which  
388 were mapped to loci which were associated with at least one of the food  
389 liking traits at  $p < 5 \times 10^{-8}$ . Information about the full list of loci can be found in  
390 Supplementary Table 3.

391 Tissue enrichment analysis was conducted using FUMA<sup>39</sup> looking at the  
392 general and specific GTEx tissues as reference. Gene Ontology term  
393 enrichment analysis was conducted using the enrichGO() function from the  
394 clusterprofiler R package (3.16.1)<sup>40</sup>.

395

### 396 **Correlation with brain MRI traits.**

397 To estimate genetic correlation with brain MRI, we first obtained 3,260  
398 GWAS summary statistics on Imaging-derived phenotypes (IDP) from  
399 multimodal brain imaging (excluded diffusion MRI and ICA25) from Oxford  
400 Brain Imaging Genetics Server - BIG40  
401 (<https://open.win.ox.ac.uk/ukbiobank/big40/>)<sup>41</sup>. These IDPs included  
402 morphological traits as well as functional neural response traits. For the  
403 morphology measures cortical thickness, surface area and volumes were

404 calculated in regional brain areas for various parcellations of the brain  
405 (Freesurfer atlases).  
406 Briefly these areas/networks were derived by applying a technique called  
407 “group independent component analysis” (ICA) which identifies a  
408 prespecified number of networks as independent from each other as  
409 possible. This was estimated in UK Biobank using two different values: 25  
410 and 100 with the ICA100 identifying smaller brain areas. In particular for  
411 our analyses we used the ICA100 traits which include 55 non-artifact nodes  
412 and 1485 edges (between nodes) for a total of 1540 traits.  
413 The functional neural response traits included the average neural response  
414 over time during a resting-state scan in 55 non-artifact network maps from  
415 the ICA100 IDPs (each encompassing multiple regional brain areas), as  
416 well as the edges between all 55 ICA maps. The derivation of the ICA100  
417 traits has been described in detail elsewhere<sup>42</sup>. We removed IDPs with low  
418 heritability or large uncertainty of heritability estimates ( $p < 0.05$ ), resulting  
419 in 2,329 IDPs tested for genetic correlations. Genetic correlations were  
420 estimated using high-definition likelihood (HDL)<sup>43</sup> to maximise power.  
421 Genetic correlations were tested only with the three main dimensions  
422 coming from the hierarchical factor analysis. We applied FDR to correct

423 multiple testing on 6987 pairs (significance threshold was set to  $q < 0.05$ )  
424 (Supplementary Table 4).

425

## 426 **Results**

427

428 Supplementary Table 1 presents descriptive summary statistics for the  
429 food-liking traits.

430

### 431 **Mapping the relationships between food items**

432 As the first step in our analysis, we aimed to map the relationships between  
433 the different food preferences. After running the GWAS on all the  
434 questionnaire items, we computed the genetic correlation matrix and  
435 compared it with the phenotypic one (Fig S1). The resemblance between  
436 the two correlations was very high ( $r = 0.91$ , Supp Fig 1B), but the genetic  
437 correlations between the food-liking traits were on average twice as large  
438 as the phenotypic correlations, likely due to the high measurement error in  
439 the food-liking questionnaire.

440

441 Looking at the hierarchical clustering of the foods based on their genetic  
442 correlations (Supplementary Fig 1A), two main groups of foods were easily

443 identified: one that included what could be considered “high-reward” foods,  
444 such as meat, desserts and fried foods, and another group that included a  
445 larger and wider variety of items ranging from fruit, to alcoholic beverages,  
446 unsweetened caffeinated drinks and cheese.

447

448 Hierarchical factor analysis as described above led to a tree structure  
449 model composed of up to 4 levels (Fig 2A and supplementary file 1), with  
450 three main dimensions of food liking at the top with the final model  
451 comprising 119 questionnaire items out of the initial 144 .

452 The first factor trait included highly energetically rewarding and widely  
453 accepted foods such as desserts, meat and savoury foods which we  
454 named “F-Highly palatable”. The second was composed mainly of low  
455 caloric foods such as vegetables, fruit and wholegrain, which we defined as  
456 “F-Low caloric”. The third was composed of items for which liking is  
457 generally acquired, such as unsweetened coffee, alcohol, cheese and  
458 strong-tasting vegetables, which we refer to as “F-Learned”. Finally a fourth  
459 minor group was composed of F-sweetened caffeinated drinks.

460

461

462

463

464

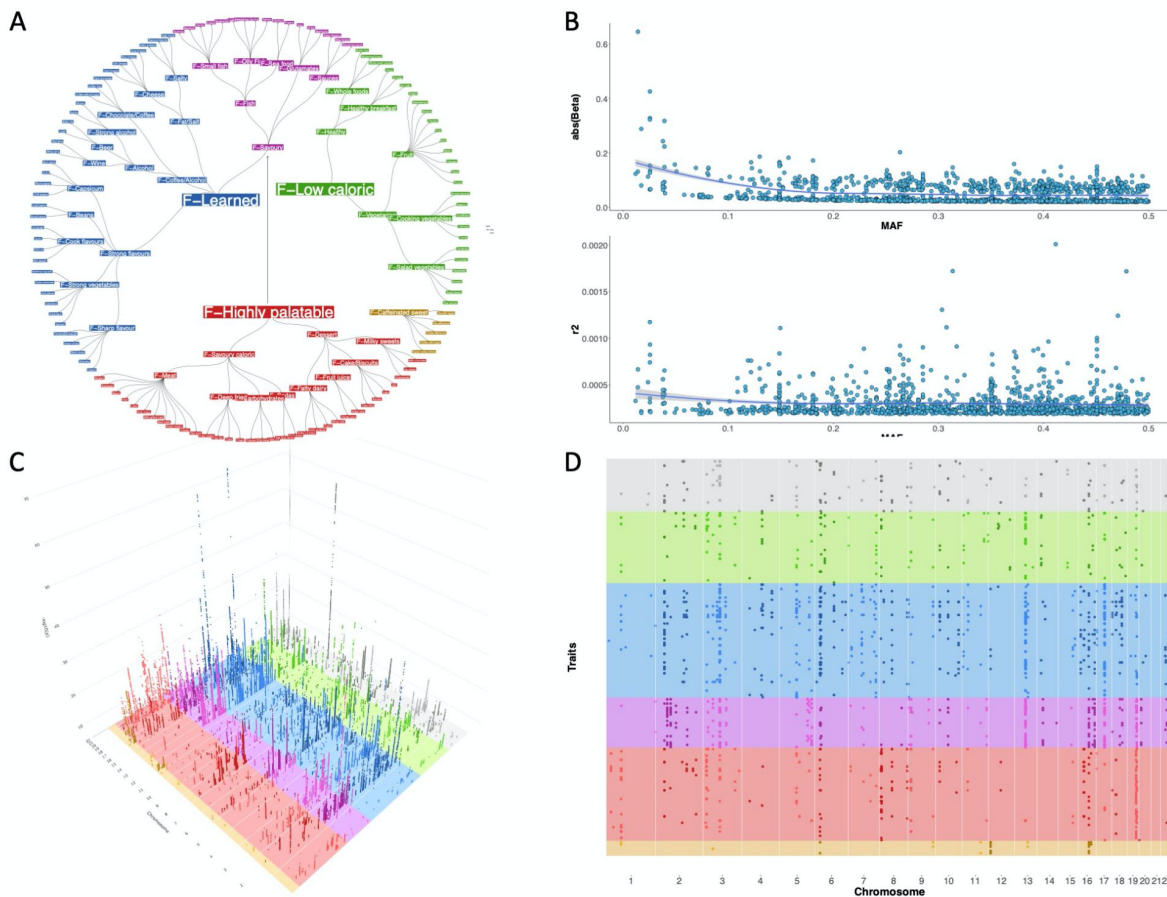

465

466

467

468

469 **Fig 2.** Food-liking map and genome-wide association results. (A).

470 Hierarchical model of relationships between liking of different foods. The

471 leaves represent the original food liking traits which were measured with

472 the questionnaire. Colours reflect the membership in one of the four

473 independent dimensions: Red, F-Highly palatable; Blue, F-Learned; Green,

474 F-Low Caloric; Light brown, F-Caffeinated sweet drinks. F-Savoury foods

475 are colored purple as they contribute to both F-Highly palatable and F-

476 Learned Foods. (B). Upper panel represents the relationship between the

477 minor allele frequency and effect size. As in most complex traits, there is an

478 inverse relationship between MAF and effect size. Lower panel represents

479 the same SNPs but  $r^2$  is reported on the y axis, showing no relationship

480 between the two measures. (C). 3D Manhattan plot, only SNPs with



481 *p* < 5 × 10<sup>-8</sup> have been reported. Colours reflect those used in panel A. (D).  
482 Bird's-eye view of the Manhattan plot. Each dot represents the top SNP  
483 from each of the sub-loci.

484

485 F-Low caloric and F-Learned traits showed a moderately strong genetic  
486 correlation ( $r_G = 0.59$ ), while the F-Highly palatable trait was more or less  
487 completely independent from either ( $r_G$ , 0.05 and 0.16, respectively). Finally  
488 the F-Caffeinated Sweet Drinks showed a weak positive correlation with the  
489 F-Highly palatable dimension ( $r_G = 0.39$ ) and a weak negative correlation  
490 with the F-Learned and F-Low caloric groups ( $r_G = -0.3$  and  $r_G = -0.25$ ,  
491 respectively).

492

### 493 **Genetic Correlation with food consumption**

494 Overall, we detected a very strong correlation between the liking measures  
495 and their corresponding consumption traits (Fig 3, Supplementary Table 5),  
496 with all correlation coefficients being >0.7, with the exception of beer  
497 ( $r_G = 0.4$ ) and white bread ( $r_G = 0.1$ ). Looking at heritability estimates, the  
498 mean SNP heritability for the liking traits (~0.08) was double that for the  
499 consumption traits (~0.04), and food liking always showed higher values,  
500 with the exception of dried fruit, where there was little evidence of a  
501 difference and tea, where heritability was higher for consumption.

502  
503  
504

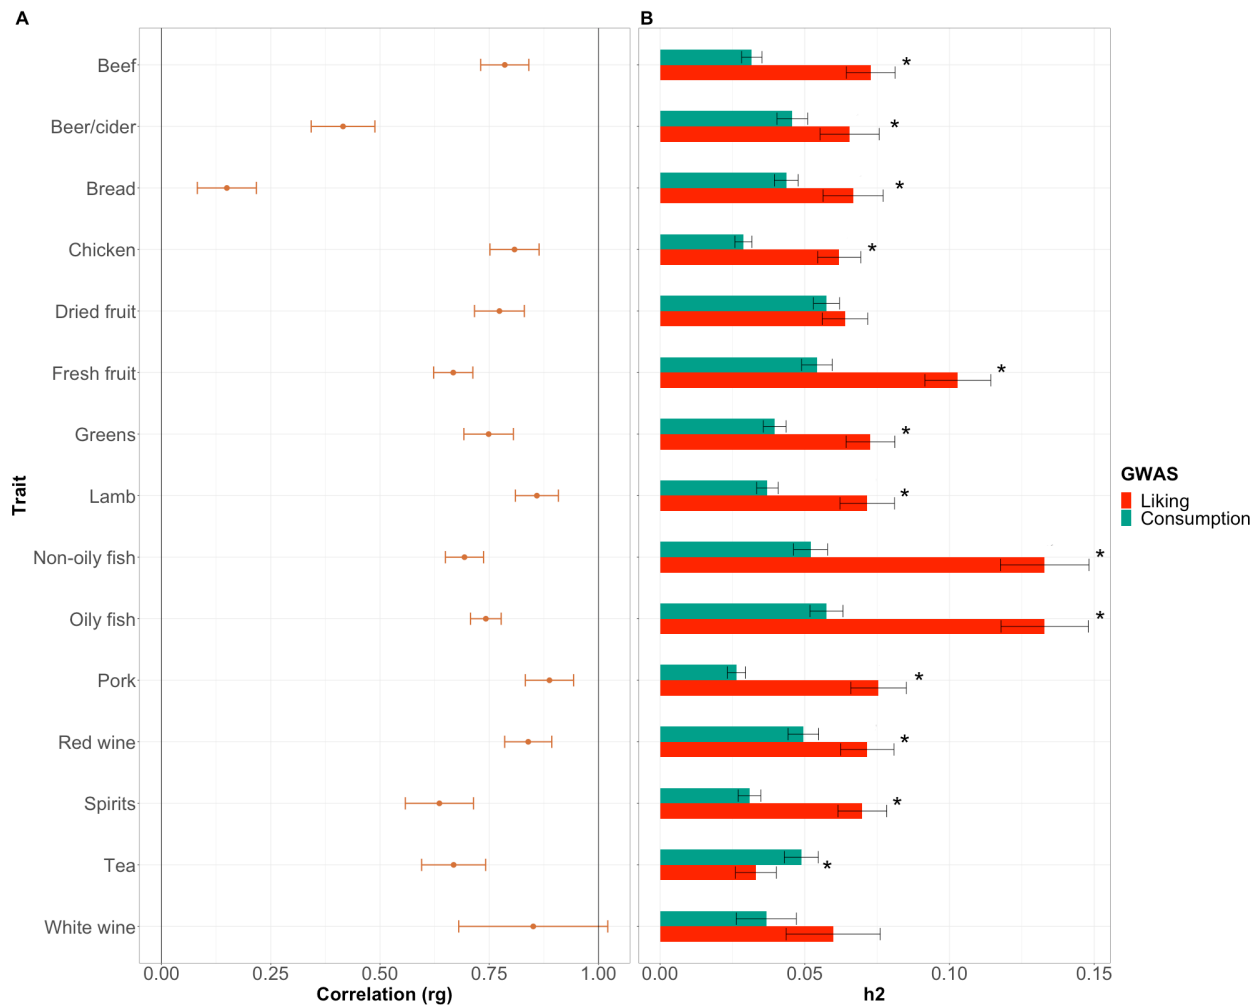

505  
506  
507  
508  
509  
510  
511  
512  
513  
514  
515  
516

*Fig 3. Genetic comparison between food liking and food consumption traits. Panel A. reports the genetic correlations between consumption and liking of the same food for all foods for which both were available, bars represent 95% CI. Panel B. Comparison between SNP heritability of food consumption (red) and liking (green). Bonferroni-corrected significant differences are indicated with a star.*

517  
518  
519  
520

## Genetic correlation with other complex traits.

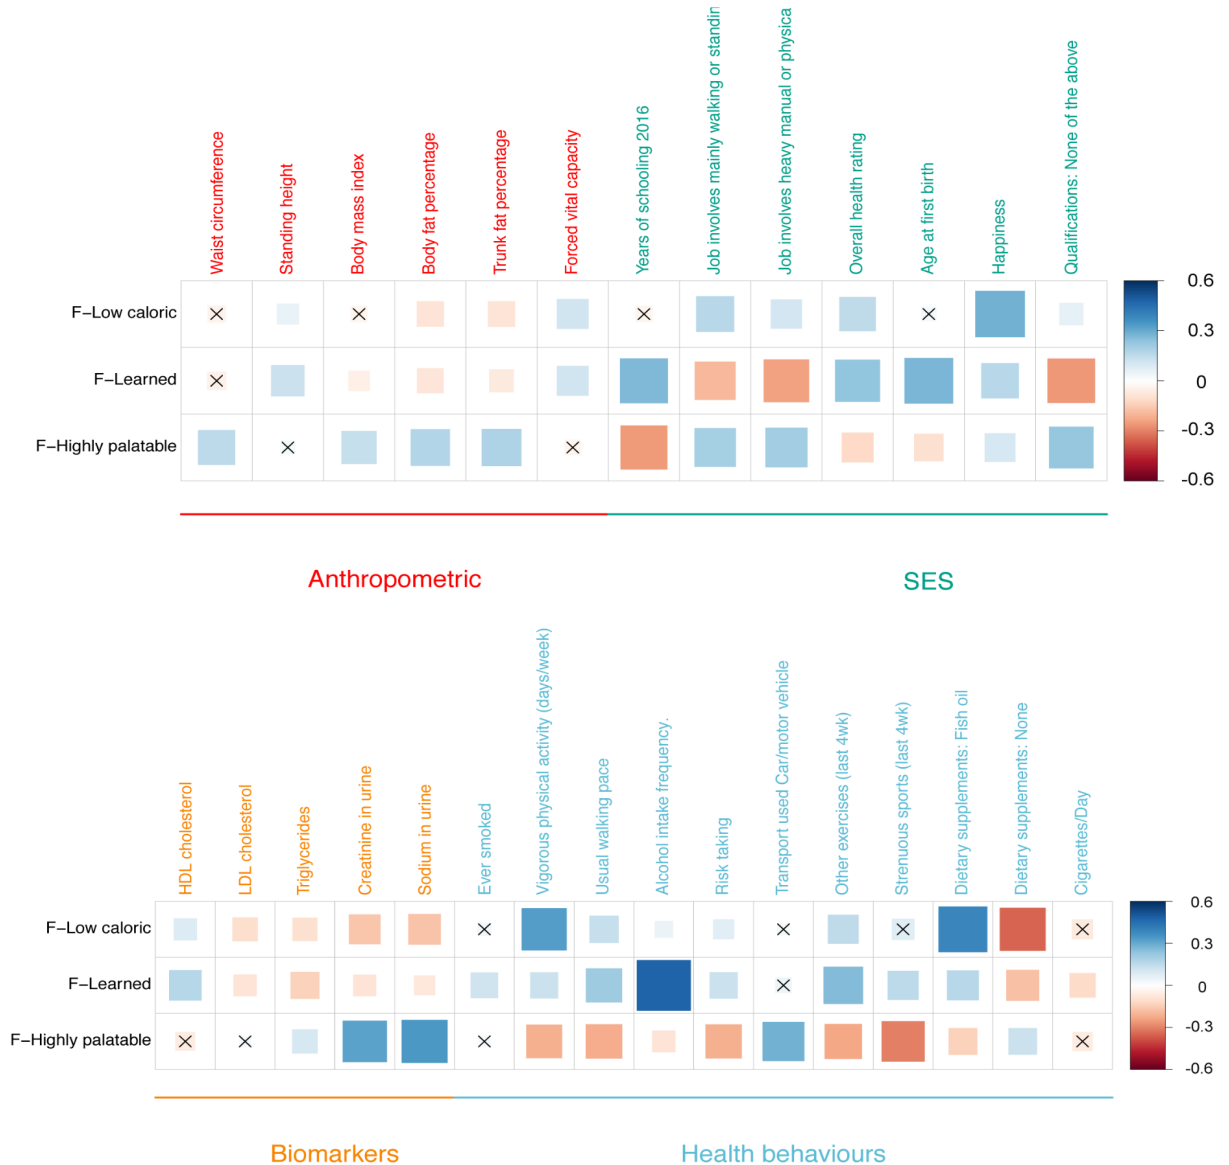

521  
522  
523  
524  
525  
526

Fig 4: Genetic correlation between the three main food liking factors and other selected complex traits. X indicates FDR > 0.05.

Genetic correlations with other complex traits (Fig 4 and Supplementary File 2) showed differences between the three main F-traits. The F-highly

527 palatable trait showed correlations with higher indices of obesity (higher  
528 BMI and body fat percentage), lower socioeconomic status and lower levels  
529 of physical activity despite showing a positive correlation with non-  
530 sedentary jobs. F-Highly palatable was also correlated with higher sodium  
531 and creatinine in urine, likely reflective of a diet richer in protein and added  
532 salt. The F-Low caloric trait showed positive correlation with higher physical  
533 activity and use of dietary supplements but also with a non-sedentary job  
534 suggesting that people reporting higher liking for the F-Low caloric trait  
535 show a general tendency for a “healthier” lifestyle. This is reflected also by  
536 the negative correlation with urinary sodium and creatinine suggestive of a  
537 healthier diet and with lower body fat percentage. The F-Learned trait was  
538 positively correlated with indexes of higher socioeconomic status such as  
539 years in schooling and a sedentary job, a overall healthier blood lipid and  
540 obesity profile and higher physical activity although it also correlated with  
541 higher likelihood of having smoked and higher alcohol consumption.

542

### 543 **GWAS results.**

544 In our GWAS of food liking, we identified evidence for 1401 genetic  
545 associations divided into 173 loci (Fig 2 , Supplementary Table 6). 143 loci  
546 out of 173 corresponding to 1270 out of 1401 associations showed

547 correlations with multiple traits, with the *FTO* locus being associated with  
548 58 traits, suggesting high levels of pleiotropy.

549

### 550 **Pleiotropy and colocalisation**

551 Colocalisation analysis with HyperColoc (Supplementary Tables 7 and 8)  
552 showed that most traits that were associated in the same locus, also  
553 colocalised. Within the 143 loci, 138 showed at least one group of traits  
554 which colocalised with each other for a total of 203 distinct clusters. 225 of  
555 the 1270 association did not colocalise with any other trait.

556

### 557 **Replication**

558 Replication analysis in up to 26,154 people (median 15,736) from 11  
559 different cohorts was able to replicate 61 (one tailed  $p < 0.05$  and same  
560 direction of effect) out of 235 testable associations (26%) (Supplementary  
561 Table 9). However, 194 associations corresponding to 82.5% showed  
562 consistency of direction of effect (binomial test  $p = 5 \times 10^{-25}$ ).

563

### 564 **Gene prioritization**

565 Gene prioritization (see Methods for details) allowed us to identify 250  
566 genes as being most likely causal. Close to half of the associations (43.8%)

567 were intragenic, with roughly 7% of non-synonymous variants and about  
568 the same proportion (~6%) of SNPs located either in the 3' or 5'  
569 untranslated region. Only ~1% could be explained by synonymous variants.  
570 Rather unsurprisingly, 12 of the prioritised genes encoded either taste (4)  
571 or olfactory receptors (8) and highlighted many novel associations. For  
572 example, the strongest association we detected was between *OR4K17* and  
573 liking of onions (beta=0.31 on a 9 point scale,  $p=4 \times 10^{-71}$ ).  
574 Amongst taste receptors, associations were identified only for bitter  
575 receptors and all were associated to traits belonging either to the learned or  
576 low caloric group while none were associated with the Highly palatable  
577 foods. A similar pattern was observed also for the genes encoding olfactory  
578 receptors. Of particular interest are the variants of the *TAS2R38* gene,  
579 which were associated with salty foods, alcoholic beverages, horseradish  
580 and grapefruit, confirming our previous results<sup>17,44</sup>, which provided  
581 evidence for association between this locus and adding salt to food and  
582 consuming red wine, but also expanding this finding to other alcoholic  
583 beverages.  
584 Similarly, there were other cases which corroborated and expanded upon  
585 previous reports. For example, variants near the *FGF21* gene, which has  
586 been previously associated with consumption of sweet foods<sup>45</sup>, were also

587 negatively associated with stronger-tasting foods, especially fish but also  
588 eggs, mayonnaise and fatty foods.

589

### 590 **Distinguishing direct from mediated effects.**

591 As shown by the colocalization analysis, the hierarchical relationships  
592 between the food preference traits give rise to a very high level of  
593 pleiotropy. Thus, in order to be able to predict the potential function of the  
594 identified genes, it is important to be able to understand at which level of  
595 the hierarchical tree of food liking the variant is primarily associated with. If  
596 we think of liking fruit, for example, we can imagine that some variants may  
597 be associated with all fruits while others may be associated with specific  
598 fruits such as apples or oranges. To resolve this issue, we fit the effect of  
599 each sentinel SNP onto all nodes of the model at the same time as outlined  
600 in Materials and Methods and determine if the observed effect was direct or  
601 mediated through one of the correlated traits. Of the initial 1261  
602 associations which could be tested within the hierarchical model, only 495  
603 were inferred to be direct effects. As an exemplar case, Fig 5 shows the  
604 effects of this approach for the *ADH1B* locus.

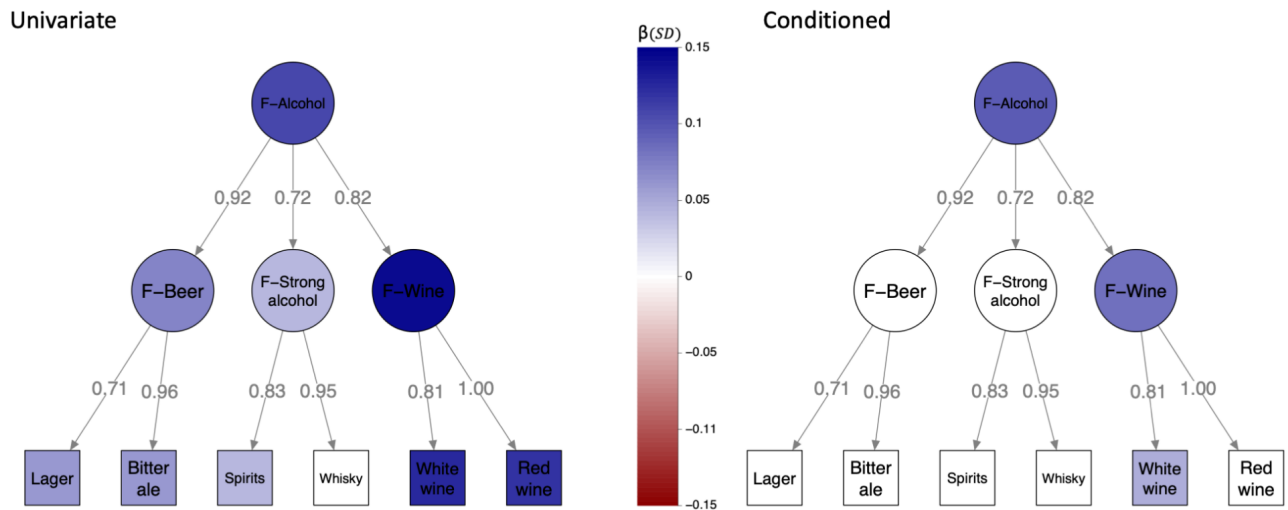

605

606 *Fig 5. Example of univariable vs conditioned analysis of rs1229984. The*  
607 *path graph represents the hierarchical model up to the alcohol trait.*

608 *Numbers over the edges report the standardised loadings. Colour is*  
609 *proportional to effect size. Effect sizes with  $p < 1.4 \times 10^{-3}$  have been shrunk to*  
610 *0.*

611

612 As can be seen, there was strong evidence that the rs1229984 SNP was

613 associated with most alcoholic drinks. However, this SNP had a lesser

614 effect on the stronger alcoholic drinks, suggesting a different weight of

615 alcohol-liking, depending on its concentration. After the conditional

616 analysis, only the effect of rs1229984 on alcohol remained unchanged,

617 suggesting that *ADH1B* may exert most of its effect on alcoholic beverages

618 through liking of alcohol in general, although residual effects remain on

619 wine and white wine. Figures for most likely causal SNPs of the 208

620 association clusters comprising the full model can be found in

621 Supplementary File 3 and Supplementary Table 10



## 622 **Tissue and Functional enrichment analysis**

623 Functional enrichment expanding the gene selection to all loci with  $p < 5 \times 10^{-8}$   
624 <sup>8</sup> (Supplementary Table 3), resulted in very strong enrichment of cellular  
625 components and biological processes related to neurons and specifically to  
626 glutamatergic and GABAergic synapses (Fig 3), both important and well-  
627 known modulators of hedonic responses to foods. These results are in line  
628 with the tissue enrichment analysis, where the only tissue that showed  
629 evidence for upregulation was the brain (Fig 6; Supplementary Table 11-  
630 12)

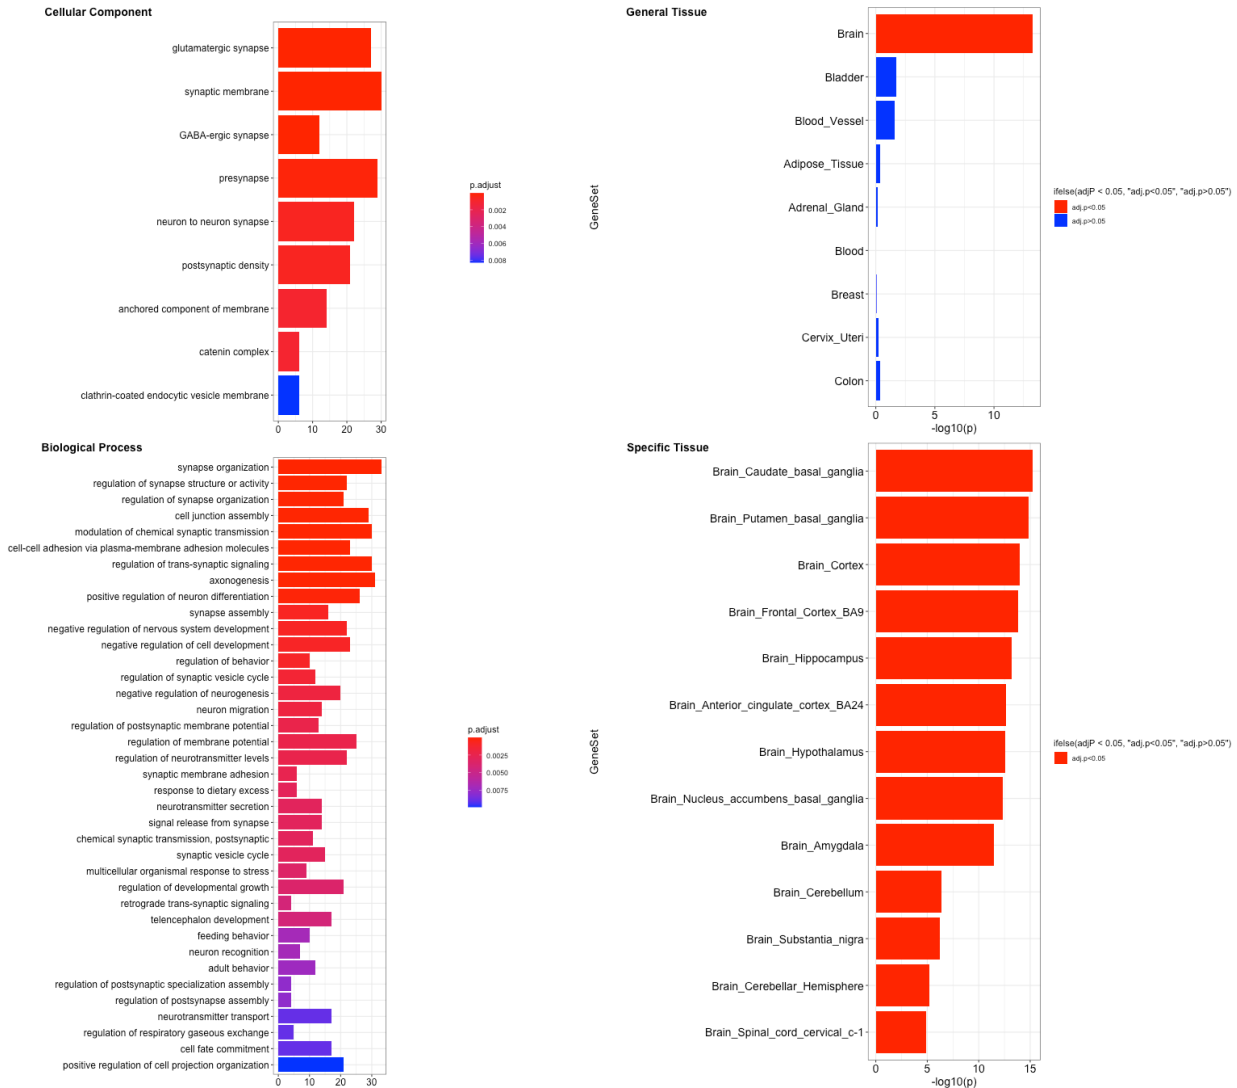

631

632

633 *Fig 6. Enrichment analysis of food-liking genes. Figure represents the*  
 634 *results of the GO terms and tissue up-regulated genes using the prioritised*  
 635 *genes from all loci with  $p < 5 \times 10^{-8}$ . Right panels show the summarised*  
 636 *significant GO Terms (FDR < 0.05) while the left ones report the tissue*  
 637 *enrichment using the general tissues (upper panel) and the specific ones*  
 638 *(bottom panel).*

639

640

641

642

643 **Genetic correlation with brain morphology and connectivity traits**

644 Genetic correlations with the brain morphology traits and IC100 rfMRI  
645 networks (Fig 7 and Supplementary table 13) evidenced clear differences  
646 in both types of traits. The morphological associations with the learned and  
647 low-caloric liking dimensions are characterized by negative correlations  
648 with cortical thickness in frontal (middle frontal, inferior frontal and orbital),  
649 parietal (intra-parietal and pre-cuneus) and occipital (cuneus, calcarine and  
650 lateral) areas, as well as positive correlations with cortical surface area in  
651 frontal/parietal transition area at the base of the (peri) central sulcus, in the  
652 temporal lobe in the fusiform area, and insula. In contrast, the Highly  
653 palatable liking dimension shows negative correlations with striatal volumes  
654 (in putamen and caudate) and no evident positive correlations.

655

656 The connectivity network trait associations are also characterized by  
657 overlap in networks between learned and low-caloric, which both show  
658 (positive and negative) associations with frontal (somato-motor, language),  
659 parietal (intra-parietal), temporal (hippocampus, fusiform) and occipital  
660 (cuneus) areas. The Highly palatable food liking dimension shows few  
661 associations with connectivity networks, and when it does, they are

662 characterized by positive associations with rostral frontal-parietal networks  
663 in frontal eye fields and intra-parietal cortex.

664 Summarizing, the morphological and network connectivity associations of  
665 the food-liking dimensions show parallel effects in the brain, such that both  
666 learned and low-caloric factors show associations with morphology in  
667 frontal, parietal and occipital areas and connectivity in networks involving  
668 the same areas, while the high-palatable dimension shows distinct  
669 associations, notably a negative association with morphology of striatal  
670 areas.

671

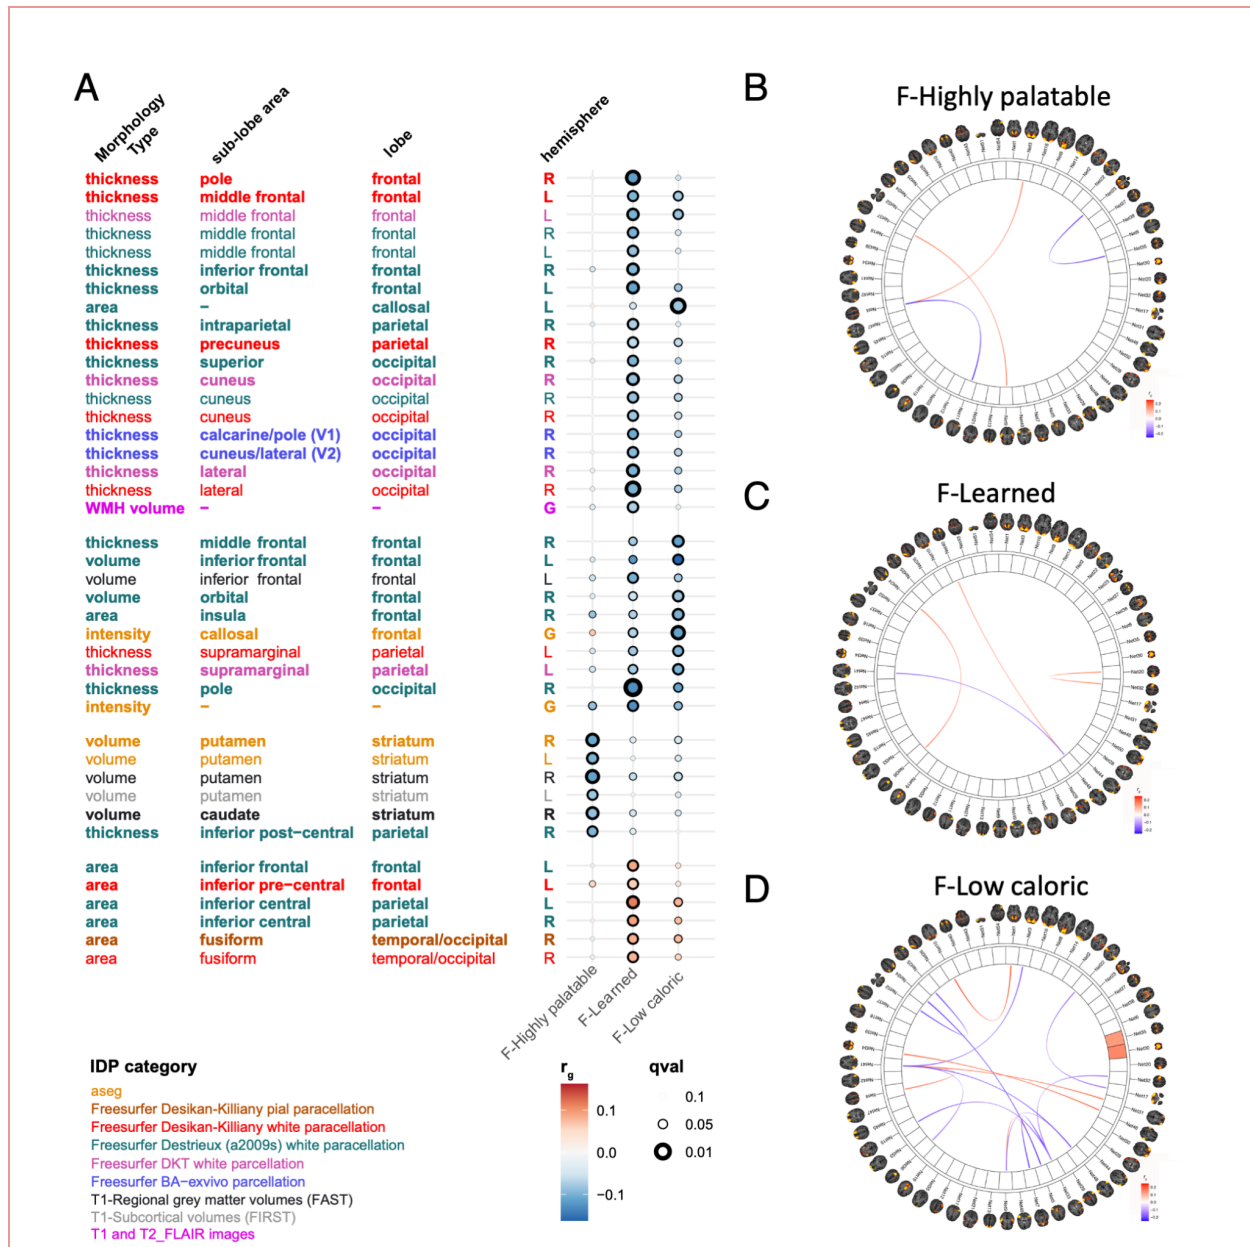

672

673

674 **Fig. 7.** Genetic correlations between three main food-liking dimensions and

675 brain MRI traits. Only traits with  $qvalue < 0.05$  have been reported. Panel A

676 reports the genetic correlations between the three main liking dimensions

677 and brain MRI morphological traits. Colour reflects the atlas used while size

678 of the dots size is proportional to  $q$ -values. Panels B, C and D genetic

679 correlations with the ICA100 network traits.

680

681

## 682 **Discussion**

683

684 In this work, we have for the first time examined the genetic bases of food  
685 liking in a wide and comprehensive way. We have shown that it is possible  
686 to use genetic correlations to study the relationships between the food traits  
687 highlighting the complexity of these relationships and identifying three main  
688 distinct overall dimensions. We have also shown that these dimensions  
689 show different correlation patterns with both morphological and functional  
690 brain MRI traits. Furthermore, we have identified 171 loci involved in 1401  
691 locus-trait associations, most of which have never been described before.  
692 Finally, we have used genomic structural equation modelling to disentangle  
693 many of the associations highlighting the main effects from those at least  
694 partly mediated through the effect of other food traits.

695

696 Food liking has been consistently shown to be a heritable trait in twin  
697 studies<sup>11–16</sup>. Here, we have shown that food liking also has a non-negligible  
698 SNP heritability and that it is twice as big as that of food consumption, in  
699 line with the idea that food liking is more influenced by biology than actual  
700 behaviour.

701

702 The fact that the genetic correlations between liking and food behaviour  
703 was relatively high, even when measured ~10 years apart, suggests that  
704 the genetic factors underlying these two processes are very similar, while  
705 differences likely arise mostly from environmental factors and from the  
706 inherent differences between liking and choice. The fact that food liking is  
707 still so strongly correlated to consumption, even if measured later in time,  
708 suggests that food liking is relatively stable through time, at least in adults.  
709 Looking at the comparison between genetic and phenotypic correlations  
710 amongst the food items, they resemble each other quite closely ( $r=0.91$ ),  
711 although the genetic correlations are twice as big as the phenotypic  
712 correlations. This likely reflects the random measurement error inherent in  
713 the use of questionnaires in measuring food liking and shows that genetic  
714 correlations may have advantages to assessing inter-relationships among  
715 food-related phenotypes. This strong relationship has been particularly  
716 useful in defining our hierarchical model, increasing our ability to identify  
717 the underlying dimensions common to multiple foods.

718

719 Whilst the current study is not the first to map how liking for different foods  
720 are related to each other, this is the largest and most comprehensive study  
721 to date, having used more than 150 thousand people and covered a wide

722 range of food groups and flavours. In many cases, foods were clustered as  
723 expected (e.g., fresh vegetables and fruit) but in other cases have  
724 highlighted big differences in foods which are commonly considered as a  
725 single group. For example, while the genetic correlation between “cooked  
726 vegetables” and “salad vegetables” is very strong (0.79), when we consider  
727 also vegetables with stronger tastes such as spinach or asparagus (the  
728 “strong vegetables” group), this results in a much weaker correlation (0.38  
729 and 0.54, respectively), despite the fact that these items would have  
730 generally all been considered “vegetables”. Our hypothesis-free approach  
731 thus captured these previously undescribed differences, which are of great  
732 importance in interpreting the results of nutritional studies.

733

734 When compared with the results from Vink et al<sup>15</sup>, our results show a clear  
735 resemblance between our first order traits and those identified through  
736 PCA. However, our strategy of using a multi-order hierarchical model  
737 allowed the identification of only a few higher order dimensions, highlighting  
738 the minimal correlation between very high reward foods such as sweets,  
739 meat and fried (the “F-Highly palatable” group) and other lower caloric and  
740 stronger taste intensities (F-Low caloric and F-Learned).

741



742 Looking at the genetic correlation with other complex traits we can see that  
743 the F-Highly palatable factor is, as expected, correlated with a worse  
744 anthropometric and lipid profiles, with signs of a diet rich in protein and salt.  
745 The F-Low caloric and F-learned show the opposite pattern, both  
746 associated with lower indices of obesity and a better blood lipid profile, with  
747 a diet lower in salt and protein. When we however look closer, these two  
748 factors do show some differences. The F-Learned factor is associated with  
749 a higher educational attainment and a sedentary job, likely indices of higher  
750 socioeconomic status, while for the F-Low caloric we see a different pattern  
751 where there is no correlation with educational attainment but a positive one  
752 for non-sedentary jobs.

753

754 Looking at the genetic correlations with the brain MRI morphological traits,  
755 while F-low caloric foods and F-Learned ones again show some  
756 agreement, the F-high palatable foods shows none with the other liking  
757 dimensions. Strikingly the Highly palatable foods correlated only  
758 (negatively) with striatum in putamen and caudate. Over-consumption of  
759 highly palatable energy-dense foods and adiposity are both associated with  
760 downregulation of neural responses in these areas. When we look at the  
761 areas involved with the other two other dimensions, we note they associate

762 with areas involved with sensory responses, identification and decision  
763 making. These results indirectly confirm and validate our findings showing  
764 that the dimensions we have derived are not just an artefact of statistical  
765 inference, but correspond to true biological processes. Alternatively, they  
766 may reflect adaptations to dietary choices that result from the liking  
767 dimensions. They also suggest the existence of two distinct processes,  
768 mostly independent from each other, which underlie liking for the two  
769 groups of foods. This has profound implications in how food preferences in  
770 these two domains arise and in the shaping of future studies aimed at  
771 understanding them better.

772  
773 Many studies which have looked at the genetics of food liking have focused  
774 on taste receptors, particularly on bitter ones. In this study, we have been  
775 able to confirm some of the previous findings such as that of the *TAS2R43-*  
776 *46* locus and coffee liking<sup>21</sup>. For example, we observed a strong  
777 association between *TAS2R38*, responsible for PROP and PTC bitter taste,  
778 and both alcoholic beverage and salt liking, confirming our and others'  
779 previous results on consumption<sup>17</sup>. We could not, however, replicate the  
780 association with any vegetable and, in fact, we found only weak evidence  
781 for such an association with broccoli, which was also in the opposite

782 direction of what would be expected considering previous candidate gene  
783 studies. Given that we have looked at a large range of vegetables and the  
784 large sample size used, this result questions all previous candidate gene  
785 studies that have identified such associations<sup>46</sup>. Similarly, we found little  
786 evidence for an association with any of the genes coding for the sweet and  
787 umami receptor subunits (*TAS1R1-3*), again questioning some previous  
788 reports in much smaller samples of the association between these genes  
789 and sweet liking<sup>46</sup>.

790

791 When we look at the genes associated with flavour perception (see Fig S2),  
792 namely taste and olfactory receptors, we found that they associate only  
793 with the learned and low caloric foods and never with the Highly palatable  
794 foods. It is possible to speculate that this may have an evolutionary  
795 meaning, where variants which would lower liking of caloric dense foods  
796 such as those in the Highly palatable foods would be selected against,  
797 while those which increased acceptance of learned foods which are  
798 generally more aversive, would expand one's diet and thus chances of  
799 survival. Further, more specific evolutionary genetics studies are needed to  
800 test this hypothesis.

801

802 Many genes already known to be associated with the consumption of  
803 specific foods showed a more complex association pattern, influencing a  
804 much broader range of food likings. For example, we have found that the  
805 variant rs1229984 within the *ADH1B* gene was expectedly associated with  
806 liking alcoholic beverages, mirroring the results on alcohol consumption.  
807 However, when we looked beyond simple genome-wide significance and  
808 reduced our p-value threshold, we found that it shows a marginal  
809 association with liking sweet foods with a concordant direction of  
810 association (see Fig S3). A recent GWAS of sweet liking<sup>23</sup> conducted in a  
811 Japanese cohort where *ALDH2*, a variant known to be associated with  
812 alcohol consumption, is also associated with sweet liking but with the  
813 opposite effect where the allele associated with higher liking of alcohol is  
814 associated with lower liking of sweet foods. Both *ADH1B* and *ALDH2* gene  
815 products are responsible for metabolising alcohol in the liver and their  
816 association with alcohol consumption is believed to be through the  
817 accumulation of acetaldehyde, which gives an unpleasant feeling and thus  
818 will reduce alcohol consumption (and liking in our case) through  
819 conditioned learning. So although in both populations there is a genetic  
820 overlap between alcohol and sweet liking, this relationship is in opposite  
821 directions. These results suggest that the observed association is unlikely

822 to be due to a biological mechanism but further studies involving people  
823 who have never consumed alcohol are needed to resolve this issue.

824

825 Another important example is *FGF21* which has been reported to be  
826 associated with consumption of sugar and protein<sup>19,45</sup>

827 . Previous studies have shown that FGF21 is elevated by low protein and  
828 high carbohydrate consumption<sup>47</sup>. Soberg et al<sup>48</sup> have previously shown  
829 that the rs838133 A allele is associated with lower levels of FGF21 and  
830 with higher consumption of sweet foods without an increase in energy  
831 intake or obesity. Our results are in line with these studies, with the A allele  
832 of rs838133 associated with higher liking of sweet foods, however when we  
833 look at the lower liked foods, although proteic foods are amongst them,  
834 they are represented by fish and cheese, but not by any of the meat traits  
835 (Fig S4). Moreover, we find a much wider range of traits which also include  
836 many strong-tasting vegetables and spices suggesting that the role of  
837 FGF21 is indeed to shift liking from sweet to savoury foods, but not  
838 necessarily all in the same way.

839

840 This example clearly shows how useful our results are in interpreting  
841 previous associations, greatly increasing our understanding of the

842 phenomena behind food choices. Our results also highlight the importance  
843 of examining food liking as a whole instead of as sets of distinct  
844 sensations/food groups or macronutrients, where the interpretation of the  
845 results in one food dimension need to take account of the other factors in  
846 order to be properly interpreted. This is particularly important when  
847 studying the consequences of food liking on health status and particularly  
848 when performing Mendelian randomisation studies involving food traits.

849  
850 Another interesting example is the association between a non-synonymous  
851 variant in the *GIPR* gene and liking of the foods in the low caloric group.  
852 *GIPR* encodes the receptor of glucose-dependent insulinotropic peptide  
853 (GIP), one of the two incretins and has been associated with BMI, in  
854 particular the A allele is associated with lower BMI<sup>49</sup> and higher liking of low  
855 caloric foods and lower liking of fatty foods such as mayonnaise, cheese  
856 and cream (but not fatty meat products such as sausages) (Supplementary  
857 Fig. 5). *GIPR* encodes the receptor for the glucose-dependent  
858 insulinotropic peptide (GIP), that together with the Glucagon-like peptide-1  
859 amide (GLP-1) represent the two human incretins. Amongst many other  
860 functions, incretins have been shown to regulate energy metabolism by  
861 acting in separate neuronal populations of the central nervous system<sup>50</sup>.

862 GLP-1 and GIP have been shown to regulate food consumption  
863 synergistically by acting on the hypothalamic arcuate nucleus increasing  
864 neuronal activation and expression of pro-opiomelanocortin<sup>50</sup>. While both  
865 hormones are secreted in the presence of sugar, GIP responds also in the  
866 presence of free fatty acids<sup>51</sup>. In a recent study<sup>52</sup>, CNS-*Gipr* knockout mice  
867 showed lower food intake when exposed to a high fat diet with smaller  
868 meals with consequent lower weight. Our results align very well, suggesting  
869 that GIPR, similarly to FGF21, is acting through a shift in preferences away  
870 from fatty foods and toward lower caloric foods, leading to a lower BMI.  
871 Both these examples point to regulation of food liking as a possible path  
872 through which to regulate food intake quality in order to, for example, help  
873 people comply with dietary plans beyond simple regulation of appetite.

874

875 In conclusion, we have presented the largest GWAS of food liking in more  
876 than 150 thousand individuals. We provided strong evidence that the  
877 dimensions of food liking are not only rooted in culture and familiarity but  
878 have an important biological basis, while identifying hundreds of novel  
879 associations between genetic variation across the human genome and  
880 liking of different foods. This not only greatly increases our knowledge in

881 the field but opens up numerous paths for further studies aimed at better  
882 understanding the processes behind food choice.

883

### 884 **Acknowledgements**

885 We would like to thank all the study participants without whom this study  
886 would not have been possible. We would like to thank, Prof Catherine  
887 Sudlow for her support to this project, Dr. Jo holyday for all the work during  
888 the final questionnaire definition and roll out. We would further like to thank  
889 Dr. Michel Nivard and Dr. Yakov A. Tsepilov for the advice and the great  
890 methods they have produced. This research has been conducted using the  
891 UK Biobank Resource under Application Number 19655.

892 The Viking Health Study – Shetland (VIKING): DNA extractions and  
893 genotyping were performed at the Edinburgh Clinical Research Facility,  
894 University of Edinburgh. We would like to acknowledge the invaluable  
895 contributions of the research nurses in Shetland, the administrative team in  
896 Edinburgh and the people of Shetland.

897 We are extremely grateful to all the families who took part in this study, the  
898 midwives for their help in recruiting them, and the whole ALSPAC team,  
899 which includes interviewers, computer and laboratory technicians, clerical  
900 workers, research scientists, volunteers, managers, receptionists and  
901 nurses. Genome-wide association data was generated by Sample Logistics  
902 and Genotyping Facilities at Wellcome Sanger Institute and LabCorp  
903 (Laboratory Corporation of America) using support from 23andMe.

904 We are very grateful to the municipal administrators of all INGI cohorts, for  
905 their collaboration on the project and for logistic support. We would like to  
906 thank all participants to this study.

907

### 908 **Funding.**

909 J.F.W. acknowledges support from the MRC Human Genetics Unit  
910 programme grant, “Quantitative traits in health and disease” (U.  
911 MC\_UU\_00007/10).

912 Maria G. Veldhuizen is supported by the 2232 International Fellowship for  
913 Outstanding Researchers Program of TÜBİTAK under award number  
914 118C299.



915 This work was supported by IRCCS Burlo Garofalo of Trieste, funding 5 per  
916 mille 2015 senses "Genetics of senses and related diseases" to PG.  
917 Funding was obtained from the Netherlands Organization for Scientific  
918 Research (NWO) and The Netherlands Organisation for Health Research  
919 and Development (ZonMW) grants 904-61-090, 985-10-002, 904-61-  
920 193,480-04-004, 400-05-717, Addiction-31160008, 016-115-035, 400-07-  
921 080, Middelgroot-911-09-032, NWO-Groot 480-15-001/674, Center for  
922 Medical Systems Biology (CSMB, NWO Genomics),  
923 NBIC/BioAssist/RK(2008.024), Biobanking and Biomolecular Resources  
924 Research Infrastructure (BBMRI –NL, 184.021.007 and 184.033.111), X-  
925 Omics 184-034-019; Spinozapremie (NWO- 56-464-14192) and KNAW  
926 Academy Professor Award (PAH/6635) to DIB; Amsterdam Public Health  
927 research institute (former EMGO+); the European Community's Fifth and  
928 Seventh Framework Program (FP5- LIFE QUALITY-CT-2002-2006, FP7-  
929 HEALTH-F4-2007-2013, grant 01254: GenomEUtwin, grant 01413:  
930 ENGAGE); the European Research Council (ERC Starting 284167, ERC  
931 Consolidator 771057, ERC Advanced 230374), Rutgers University Cell and  
932 DNA Repository (NIMH U24 MH068457-06), the National Institutes of  
933 Health (NIH, R01D0042157-01A1, MH081802, DA018673, R01  
934 DK092127-04, Grand Opportunity grants 1RC2 MH089951); the Avera  
935 Institute for Human Genetics, Sioux Falls, South Dakota (USA).  
936 ALSPAC: The UK Medical Research Council and Wellcome (Grant ref:  
937 102215/2/13/2) and the University of Bristol provide core support for ALS  
938 TwinsUK receives funding from the Wellcome Trust (212904/Z/18/Z),  
939 Medical Research Council (AIMHY; MR/M016560/1) and European Union  
940 (H2020 contract #733100). TwinsUK and M.M. are supported by the  
941 National Institute for Health Research (NIHR)-funded BioResource, Clinical  
942 Research Facility and Biomedical Research Centre based at Guy's and St  
943 Thomas' NHS Foundation Trust in partnership with King's College London.  
944 O.M. is supported by Chronic Disease Research Foundation (CDRF). C.M.  
945 is funded by the Chronic Disease Research Foundation and by the Medical  
946 Research Council (MRC)/British Heart Foundation Ancestry and Biological  
947 Informative Markers for Stratification of Hypertension (AIMHY;  
948 MR/M016560/1).  
949

950 **Author contributions**

951 NP, EdG, KW, NJT, JFW, MG, designed the study; CM, EdG,MM,  
952 DB,JFW, KW, PG provided/collected data; NP, NM, SMW,MM, EJG, KW,  
953 JJH, MG, MPC analysed the data; EDG, DB JFW, PG, provided funding;  
954 NP, KW, NM, MG, JFW, NJT,EDG, wrote the manuscript. All authors  
955 reviewed and provided comments to the text.

956

957 **Data availability**

958

959 All GWAS results will be available through GWAS catalogue at the time of  
960 publication.

961 Supplementary file 3 can be downloaded at:

962 [https://drive.google.com/file/d/1wD92SjAQ0jGTQYaBRj8DI9wxz\\_QZAIJo/vi](https://drive.google.com/file/d/1wD92SjAQ0jGTQYaBRj8DI9wxz_QZAIJo/vi)  
963 [ew?usp=sharing](https://drive.google.com/file/d/1wD92SjAQ0jGTQYaBRj8DI9wxz_QZAIJo/view?usp=sharing)

964

965 **Competing interests**

966 No competing interests to declare.

967

968 **References**

- 969 1. GBD 2019 Risk Factors Collaborators. Global burden of 87 risk factors  
970 in 204 countries and territories, 1990-2019: a systematic analysis for  
971 the Global Burden of Disease Study 2019. *Lancet* **396**, 1223–1249  
972 (2020).
- 973 2. Berridge, K. C., Robinson, T. E. & Aldridge, J. W. Dissecting  
974 components of reward: “liking”, “wanting”, and learning. *Curr. Opin.*  
975 *Pharmacol.* **9**, 65–73 (2009).

- 976 3. Costell, E., Tárrega, A. & Bayarri, S. Food acceptance: The role of  
977 consumer perception and attitudes. *Chemosens. Percept.* **3**, 42–50  
978 (2010).
- 979 4. Pilgrim, F. J. The components of food acceptance and their  
980 measurement. *Am. J. Clin. Nutr.* **5**, 171–175 (1957).
- 981 5. Hayes, J. E. Influence of sensation and liking on eating and drinking. in  
982 *Handbook of Eating and Drinking* 131–155 (Springer International  
983 Publishing, 2020).
- 984 6. Köster, E. P. Diversity in the determinants of food choice: A  
985 psychological perspective. *Food Qual. Prefer.* **20**, 70–82 (2009).
- 986 7. Boyland, E. J., Kavanagh-Safran, M. & Halford, J. C. G. Exposure to  
987 “healthy” fast food meal bundles in television advertisements promotes  
988 liking for fast food but not healthier choices in children. *Br. J. Nutr.* **113**,  
989 1012–1018 (2015).
- 990 8. Masterson, T. D. *et al.* Brain response to food brands correlates with  
991 increased intake from branded meals in children: an fMRI study. *Brain*  
992 *Imaging Behav.* **13**, 1035–1048 (2019).
- 993 9. Cervellon, M.-C. & Dubé, L. Cultural influences in the origins of food  
994 likings and dislikes. *Food Qual. Prefer.* **16**, 455–460 (2005).

- 995 10. Reed, D. R., Bachmanov, A. A., Beauchamp, G. K., Tordoff, M. G. &  
996 Price, R. A. Heritable variation in food preferences and their  
997 contribution to obesity. *Behav. Genet.* **27**, 373–387 (1997).
- 998 11. Breen, F. M., Plomin, R. & Wardle, J. Heritability of food preferences in  
999 young children. *Physiol. Behav.* **88**, 443–447 (2006).
- 1000 12. Fildes, A. *et al.* Nature and nurture in children’s food preferences. *Am.*  
1001 *J. Clin. Nutr.* **99**, 911–917 (2014).
- 1002 13. Pallister, T. *et al.* Food Preference Patterns in a UK Twin Cohort. *Twin*  
1003 *Res. Hum. Genet.* **18**, 793–805 (2015).
- 1004 14. Smith, A. D. *et al.* Genetic and environmental influences on food  
1005 preferences in adolescence. *Am. J. Clin. Nutr.* **104**, 446–453 (2016).
- 1006 15. Vink, J. M., van Hooijdonk, K. J. M., Willemsen, G., Feskens, E. J. M.  
1007 & Boomsma, D. I. Causes of variation in food preference in the  
1008 Netherlands. *Twin Res. Hum. Genet.* **23**, 195–203 (2020).
- 1009 16. Keskitalo, K. *et al.* Same genetic components underlie different  
1010 measures of sweet taste preference. *Am. J. Clin. Nutr.* **86**, 1663–1669  
1011 (2007).
- 1012 17. Pirastu, N. *et al.* Using genetics to disentangle the complex  
1013 relationship between food choices and health status. *bioRxiv* 829952  
1014 (2019) doi:10.1101/829952.

- 1015 18. Cole, J. B., Florez, J. C. & Hirschhorn, J. N. Comprehensive genomic  
1016 analysis of dietary habits in UK Biobank identifies hundreds of genetic  
1017 associations. *Nat. Commun.* **11**, 1467 (2020).
- 1018 19. Meddens, S. F. W., de Vlaming, R., Bowers, P. & Burik, C. A. P.  
1019 Genomic analysis of diet composition finds novel loci and associations  
1020 with health and lifestyle. *bioRxiv* (2018).
- 1021 20. Pirastu, N. *et al.* Genetics of food preferences: a first view from silk  
1022 road populations. *J. Food Sci.* **77**, S413-8 (2012).
- 1023 21. Pirastu, N. *et al.* Association analysis of bitter receptor genes in five  
1024 isolated populations identifies a significant correlation between  
1025 TAS2R43 variants and coffee liking. *PLoS One* **9**, e92065 (2014).
- 1026 22. Robino, A., Concas, M. P., Catamo, E. & Gasparini, P. A brief review  
1027 of genetic approaches to the study of food preferences: Current  
1028 knowledge and future directions. *Nutrients* **11**, 1735 (2019).
- 1029 23. Kawafune, K. *et al.* Strong association between the 12q24 locus and  
1030 sweet taste preference in the Japanese population revealed by  
1031 genome-wide meta-analysis. *J. Hum. Genet.* **65**, 939–947 (2020).
- 1032 24. Pirastu, N. *et al.* A Genome-Wide Association Study in isolated  
1033 populations reveals new genes associated to common food likings.  
1034 *Rev. Endocr. Metab. Disord.* **17**, 209–219 (2016).

- 1035 25. Eriksson, N. *et al.* A genetic variant near olfactory receptor genes  
1036 influences cilantro preference. *Flavour* **1**, 22 (2012).
- 1037 26. Sudlow, C. *et al.* UK biobank: an open access resource for identifying  
1038 the causes of a wide range of complex diseases of middle and old age.  
1039 *PLoS Med.* **12**, e1001779 (2015).
- 1040 27. Peryam, D. R. & Pilgrim, F. J. Hedonic scale method of measuring  
1041 food preferences. *Food Technol.* **11**, 9–14 (1957).
- 1042 28. Svishcheva, G. R., Axenovich, T. I., Belonogova, N. M., van Duijn, C.  
1043 M. & Aulchenko, Y. S. Rapid variance components-based method for  
1044 whole-genome association analysis. *Nat. Genet.* **44**, 1166–1170  
1045 (2012).
- 1046 29. Jiang, L. *et al.* A resource-efficient tool for mixed model association  
1047 analysis of large-scale data. *Nat. Genet.* **51**, 1749–1755 (2019).
- 1048 30. Haller, T., Kals, M., Esko, T., Mägi, R. & Fischer, K. RegScan: a  
1049 GWAS tool for quick estimation of allele effects on continuous traits  
1050 and their combinations. *Brief. Bioinform.* **16**, 39–44 (2015).
- 1051 31. Bulik-Sullivan, B. *et al.* An atlas of genetic correlations across human  
1052 diseases and traits. *Nat. Genet.* **47**, 1236–1241 (2015).

- 1053 32. Grotzinger, A. D. *et al.* Genomic structural equation modelling provides  
1054 insights into the multivariate genetic architecture of complex traits. *Nat*  
1055 *Hum Behav* **3**, 513–525 (2019).
- 1056 33. Tsepilov, Y. A. *et al.* Analysis of genetically independent phenotypes  
1057 identifies shared genetic factors associated with chronic  
1058 musculoskeletal pain conditions. *Commun. Biol.* **3**, 329 (2020).
- 1059 34. Foley, C. N. *et al.* A fast and efficient colocalization algorithm for  
1060 identifying shared genetic risk factors across multiple traits. *Nat.*  
1061 *Commun.* **12**, 764 (2021).
- 1062 35. Winkler, T. W. *et al.* Quality control and conduct of genome-wide  
1063 association meta-analyses. *Nat. Protoc.* **9**, 1192–1212 (2014).
- 1064 36. Willer, C. J., Li, Y. & Abecasis, G. R. METAL: fast and efficient meta-  
1065 analysis of genomewide association scans. *Bioinformatics* **26**, 2190–  
1066 2191 (2010).
- 1067 37. Zhbannikov, I. Y., Arbeev, K., Ukraintseva, S. & Yashin, A. I. haploR:  
1068 an R package for querying web-based annotation tools. *F1000Res.* **6**,  
1069 97 (2017).
- 1070 38. Clogg, C. C., Petkova, E. & Haritou, A. Statistical methods for  
1071 comparing regression coefficients between models. *Am. J. Sociol.* **100**,  
1072 1261–1293 (1995).

- 1073 39. Watanabe, K., Taskesen, E., van Bochoven, A. & Posthuma, D.  
1074 Functional mapping and annotation of genetic associations with  
1075 FUMA. *Nat. Commun.* **8**, 1826 (2017).
- 1076 40. Yu, G., Wang, L.-G., Han, Y. & He, Q.-Y. clusterProfiler: an R package  
1077 for comparing biological themes among gene clusters. *OMICS* **16**,  
1078 284–287 (2012).
- 1079 41. Smith, S. M. *et al.* An expanded set of genome-wide association  
1080 studies of brain imaging phenotypes in UK Biobank. *Nat. Neurosci.* **24**,  
1081 737–745 (2021).
- 1082 42. Elliott, L. T. *et al.* Genome-wide association studies of brain imaging  
1083 phenotypes in UK Biobank. *Nature* **562**, 210–216 (2018).
- 1084 43. Ning, Z., Pawitan, Y. & Shen, X. High-definition likelihood inference of  
1085 genetic correlations across human complex traits. *Nat. Genet.* **52**,  
1086 859–864 (2020).
- 1087 44. Hayes, J. E. *et al.* Allelic variation in TAS2R bitter receptor genes  
1088 associates with variation in sensations from and ingestive behaviors  
1089 toward common bitter beverages in adults. *Chem. Senses* **36**, 311–  
1090 319 (2011).



- 1091 45. Frayling, T. M. *et al.* A common allele in FGF21 associated with sugar  
1092 intake is associated with body shape, lower total body-fat percentage,  
1093 and higher blood pressure. *Cell Rep.* **23**, 327–336 (2018).
- 1094 46. Feeney, E. L., McGuinness, L., Hayes, J. E. & Nolden, A. A. Genetic  
1095 variation in sensation affects food liking and intake. *Curr. Opin. Food*  
1096 *Sci.* (2021) doi:10.1016/j.cofs.2021.07.001.
- 1097 47. Hill, C. M. *et al.* FGF21 and the physiological regulation of  
1098 macronutrient preference. *Endocrinology* **161**, (2020).
- 1099 48. Søberg, S. *et al.* FGF21 is a sugar-induced hormone associated with  
1100 sweet intake and preference in humans. *Cell Metab.* **25**, 1045-1053.e6  
1101 (2017).
- 1102 49. Pulit, S. L. *et al.* Meta-analysis of genome-wide association studies for  
1103 body fat distribution in 694 649 individuals of European ancestry. *Hum.*  
1104 *Mol. Genet.* **28**, 166–174 (2019).
- 1105 50. NamKoong, C. *et al.* Central administration of GLP-1 and GIP  
1106 decreases feeding in mice. *Biochem. Biophys. Res. Commun.* **490**,  
1107 247–252 (2017).
- 1108 51. Sankoda, A. *et al.* Free fatty acid receptors, G protein-coupled receptor  
1109 120 and G protein-coupled receptor 40, are essential for oil-induced

1110 gastric inhibitory polypeptide secretion. *J. Diabetes Investig.* **10**, 1430–

1111 1437 (2019).

1112 52. Zhang, Q. *et al.* The glucose-dependent insulinotropic polypeptide

1113 (GIP) regulates body weight and food intake via CNS-GIPR signaling.

1114 *Cell Metab.* **33**, 833-844.e5 (2021).

1115

1116

1117

1118

1119

1120

1121

1122

1123

1124

1125

1126

1127

1128

1129

1130

1131

1132

1133

1134

1135

1136

1137

1138

1139

1140
